# Supplementary material
Source: publisher figshare collection journal article supplement (https://acs.figshare.com/ndownloader/files/3795349)

Supplemental Figure 3. Protein interaction networks for phosphoproteins with regulated phosphosites. Node colors represent phosphosite regulation during appressorium as indicated by colors in the figure key.

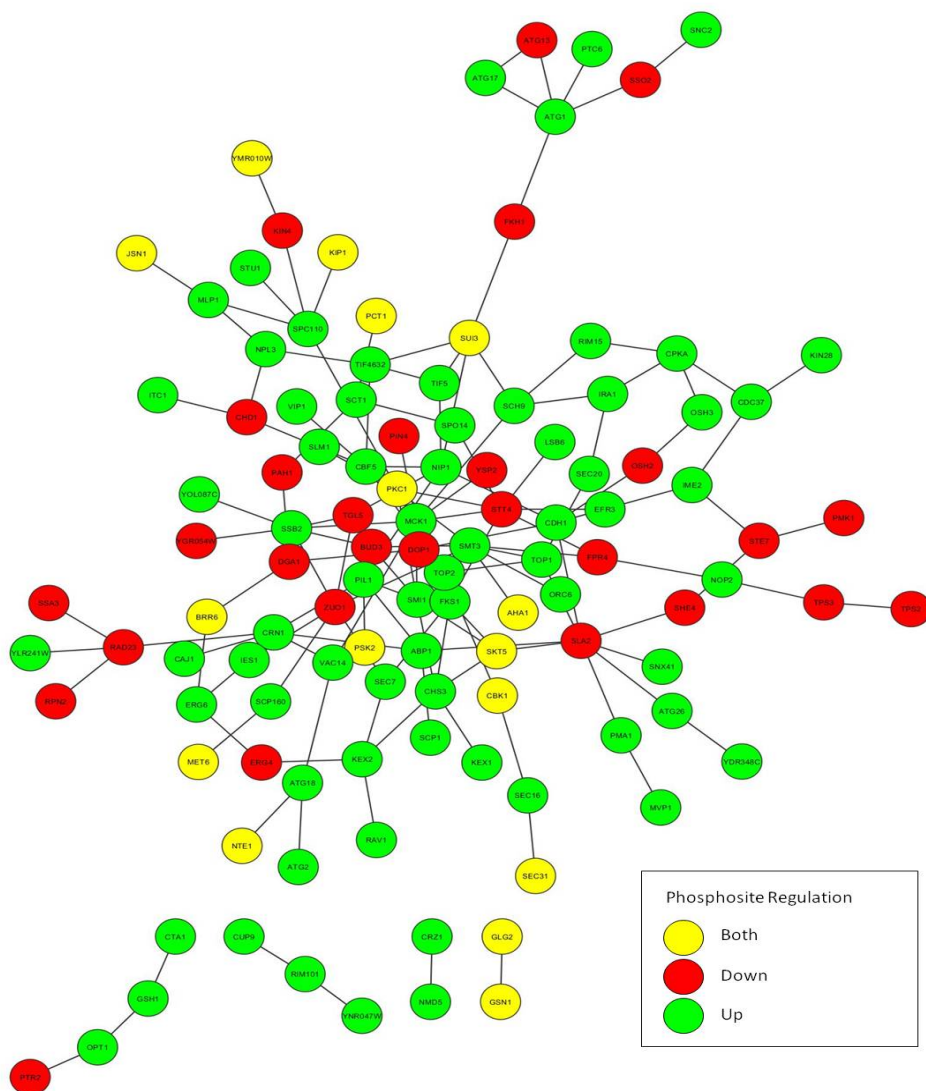

Supplement: Supplementary file 1 [file 3795349]
